# Supplementary material
Source: PubMed Central journal article supplement (PMC5217784)
Supplement: 10.1074_M116.061481_mcp.M116.061481-1.pdf [file 10.1074_M116.061481_mcp.M116.061481-1.pdf]

Supplemental Material for

**NANO-LIQUID CHROMATOGRAPHY-ORBITRAP MS-BASED QUANTITATIVE  
PROTEOMICS REVEALS DIFFERENCES BETWEEN THE MECHANISMS OF ACTION  
OF CARNOSIC ACID AND CARNOSOL IN COLON CANCER CELLS**

Alberto Valdés<sup>1</sup>, Virginia García-Cañas<sup>1\*</sup>, Konstantin A. Artemenko<sup>2</sup>, Jonas Bergquist<sup>2\*</sup>, Alejandro Cifuentes<sup>1</sup>

<sup>1</sup> Laboratory of Foodomics, Institute of Food Science Research (CIAL, CSIC), Calle Nicolás Cabrera 9, 28049 Madrid, Spain.

<sup>2</sup> Analytical Chemistry, Department of Chemistry-BMC and SciLifeLab, Uppsala University, Husargatan 3, 75124 Uppsala, Sweden.

\*Correspondence: Dr. V. García-Cañas and Prof. Jonas Bergquist

E-mail: virginia.garcia@csic.es and jonas.bergquist@kemi.uu.se

## **Table of contents**

**Supplemental Material, Table S1.** Identification and quantification of the peptides obtained after MaxQuant data processing.

**Supplemental Material, Table S2.** Identification and quantification of the proteins obtained after MaxQuant data processing.

**Supplemental Material, Table S3.** Expression ratio ( $\text{Log}_2$ ) of all DML-nano LC-MS/MS experiments performed in HT-29 cells after the treatment with different concentrations of CA and CS at different times.

**Supplemental Material, Table S4.** Expression ratio ( $\text{Log}_2$ ) of significant altered proteins ( $p$ -value  $< 0.05$ ) in HT-29 cells after the treatment with different concentrations of CA at different times.

**Supplemental Material, Table S5.** Expression ratio ( $\text{Log}_2$ ) of significant altered proteins ( $p$ -value  $< 0.05$ ) in HT-29 cells after the treatment with different concentrations of CS at different times.

**Supplemental Material, Table S6.** Phosphorylated peptides detected in HT-29 cells after the treatment with different concentrations of CA and CS at different times.

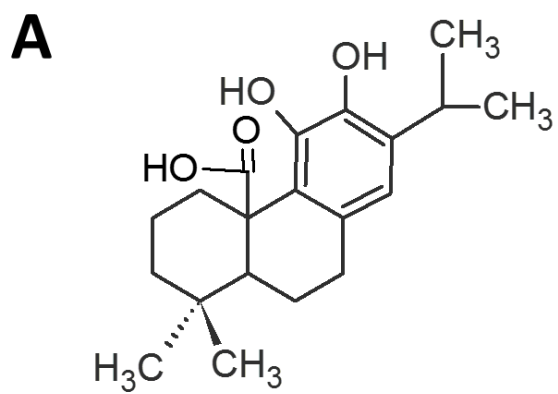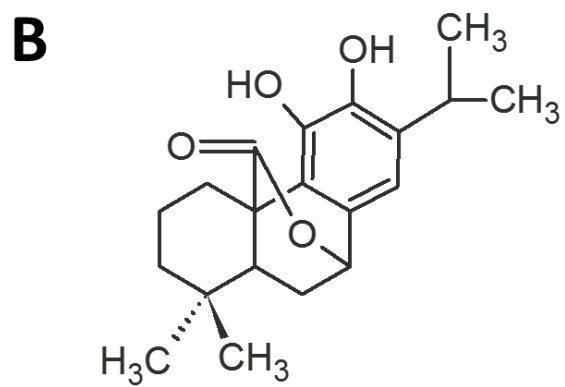

**Figure S1.** Chemical structures of CA (**A**) and CS (**B**).

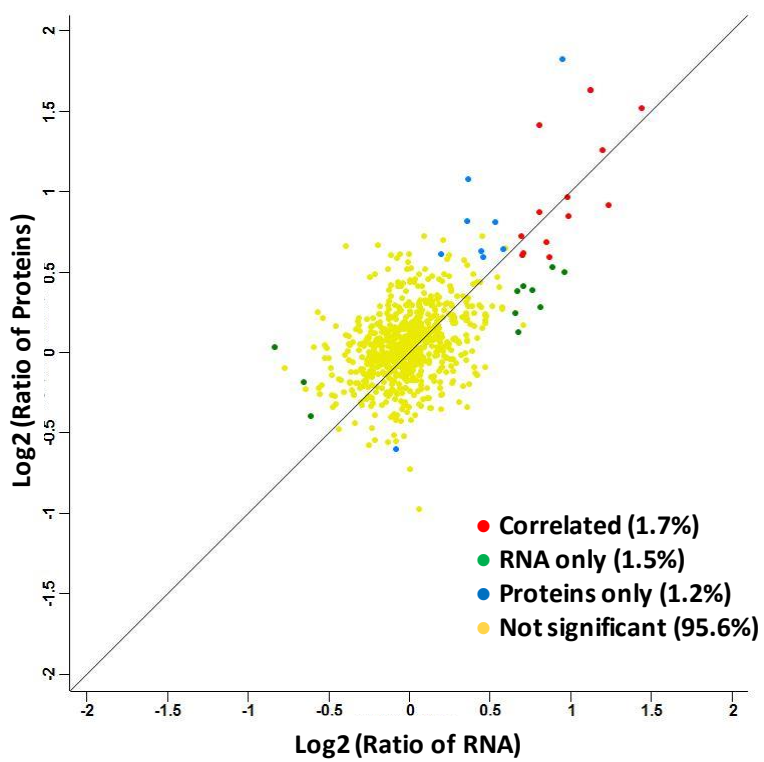

**Figure S2.** Scatter plot of mRNA versus protein expression ratios (log<sub>2</sub>) of HT-29 cells exposed to GI50 concentration of CA for 24 h.

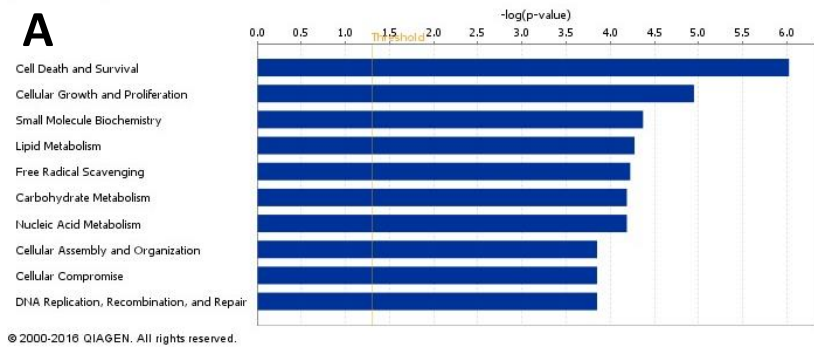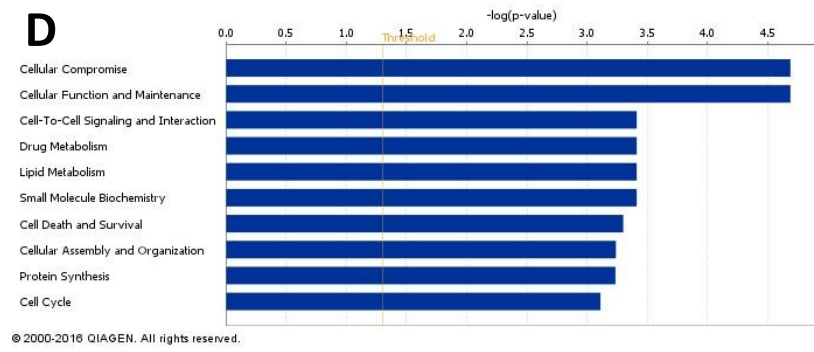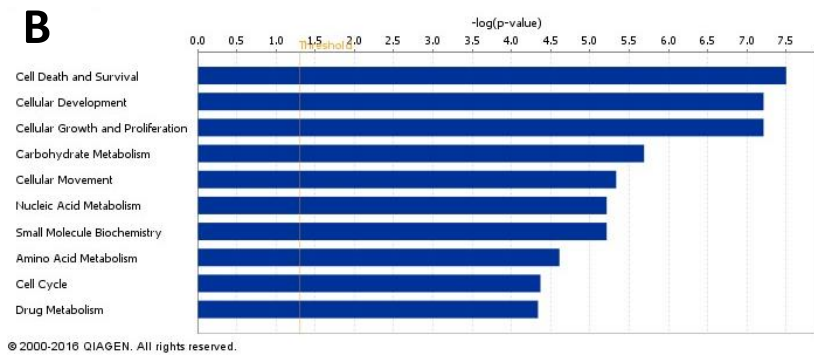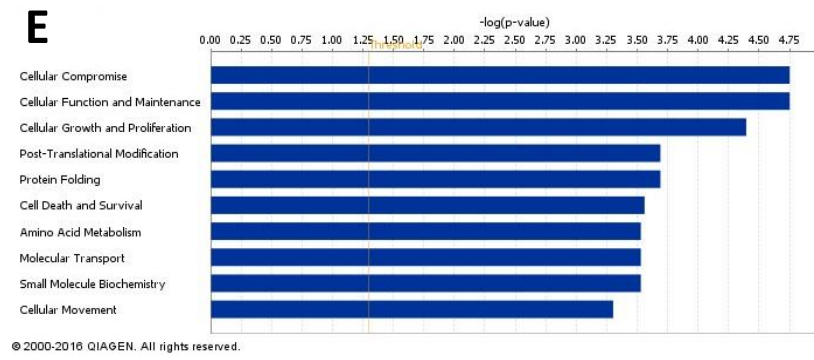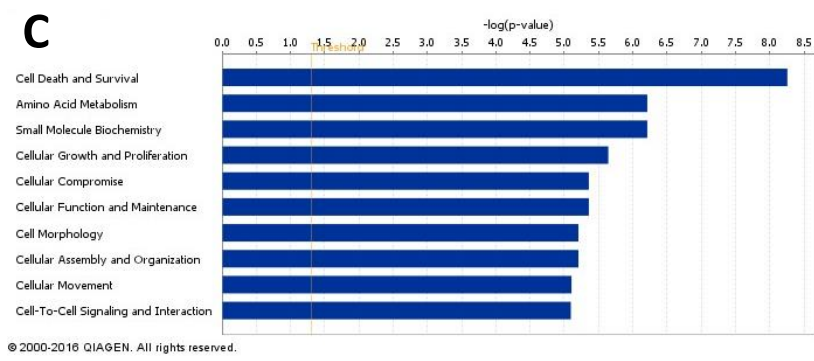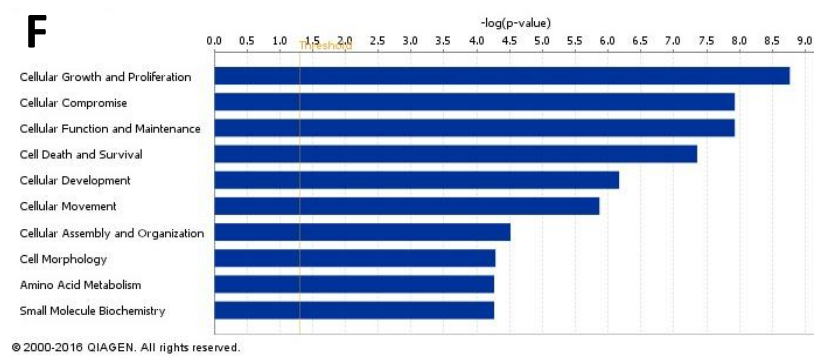

**Figure S3.** Top ten molecular and cellular functions significantly over-represented in protein datasets obtained at 24 h with different concentrations of CA (**A**, GI50; **B**, TGI; **C**, LC50) or CS (**D**, GI50; **E**, TGI; **F**, LC50). Fisher's exact test was used to calculate a p-value determining the probability that the association between the genes in the dataset and the canonical pathway is explained by chance.

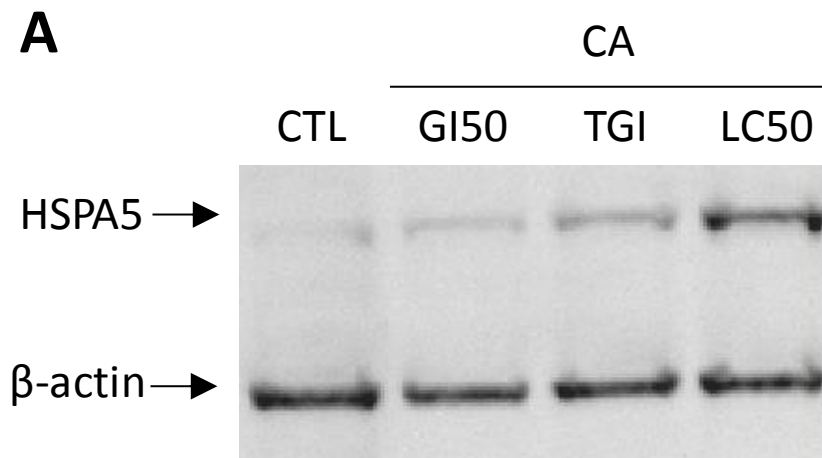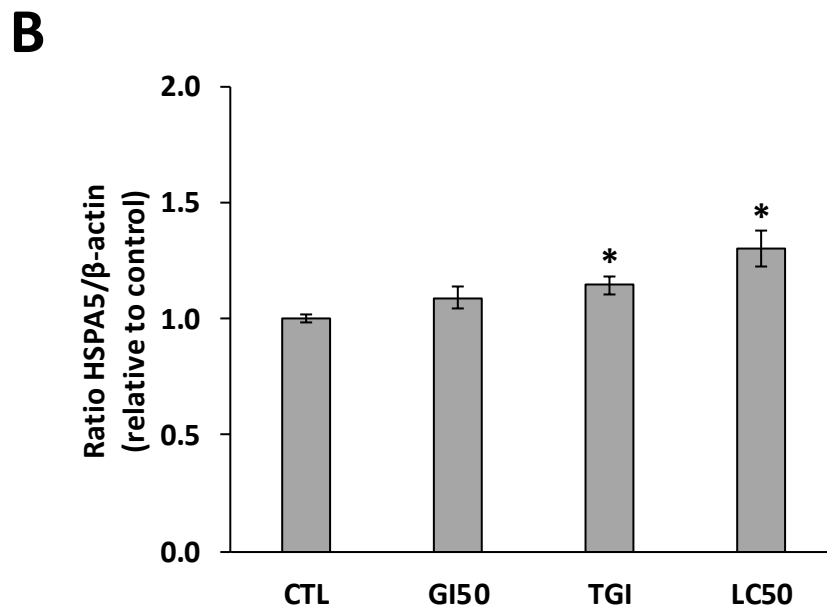

**Figure S4.** Protein levels of HSPA5 after treatment of HT-29 cells with different concentrations of CA (GI50, TGI, LC50) or control (0.2% DMSO) for 24 h. **(A)** Blots showing HSPA5 and β-actin levels from forty micrograms of protein loaded per lane. **(B)** Expression ratio of HSPA5 normalized to β-actin from three independent experiments. Bars represent mean ± SEM (\* indicates significant differences between the treated and control samples as determined by t-test, p-value < 0.05).

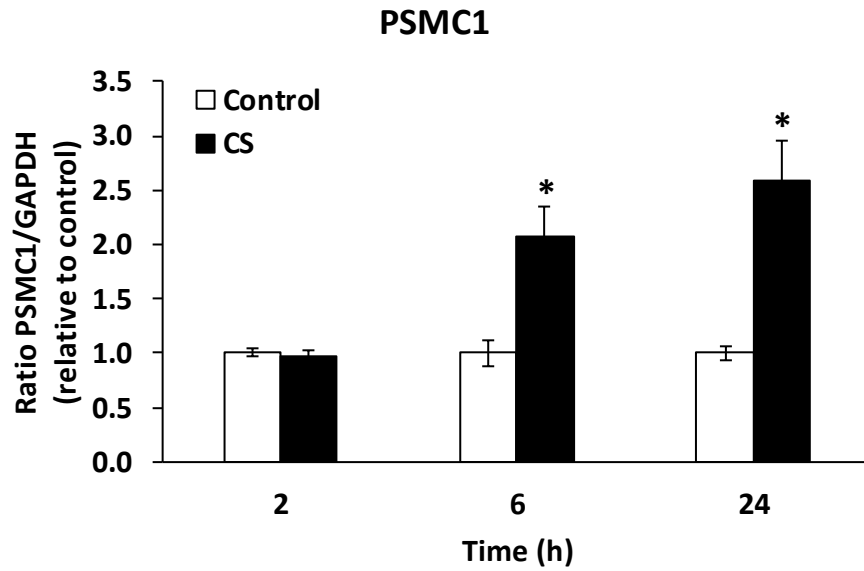

**Figure S5.** mRNA levels of PSMC1 normalized to GAPDH in HT-29 cells exposed to TGI concentration of CS or control (0.2% DMSO) for 2, 6, and 24 hours. Bars represent mean  $\pm$  SEM of three independent experiments (\* indicates significant differences between the treated and control samples as determined by t-test, p-value  $< 0.05$ ).
